# Supplementary material for: Knockdown of ELMO3 Suppresses Growth, Invasion and Metastasis of Colorectal Cancer
Source: PubMed Central journal article supplement (PMC5187919; doi:10.3390/ijms17122119), 2016-12-16
Supplement: ijms-17-02119-s001.pdf [file ijms-17-02119-s001.pdf]

## Supplementary Materials: Knockdown of ELMO3 Suppresses Growth, Invasion and Metastasis of Colorectal Cancer

Hui-Yun Peng, Qiong-Fang Yu, Wei Shen, Cheng-Ming Guo, Zhen Li, Xiao-Yan Zhou, Nan-Jin Zhou, Wei-Ping Min and Dian Gao

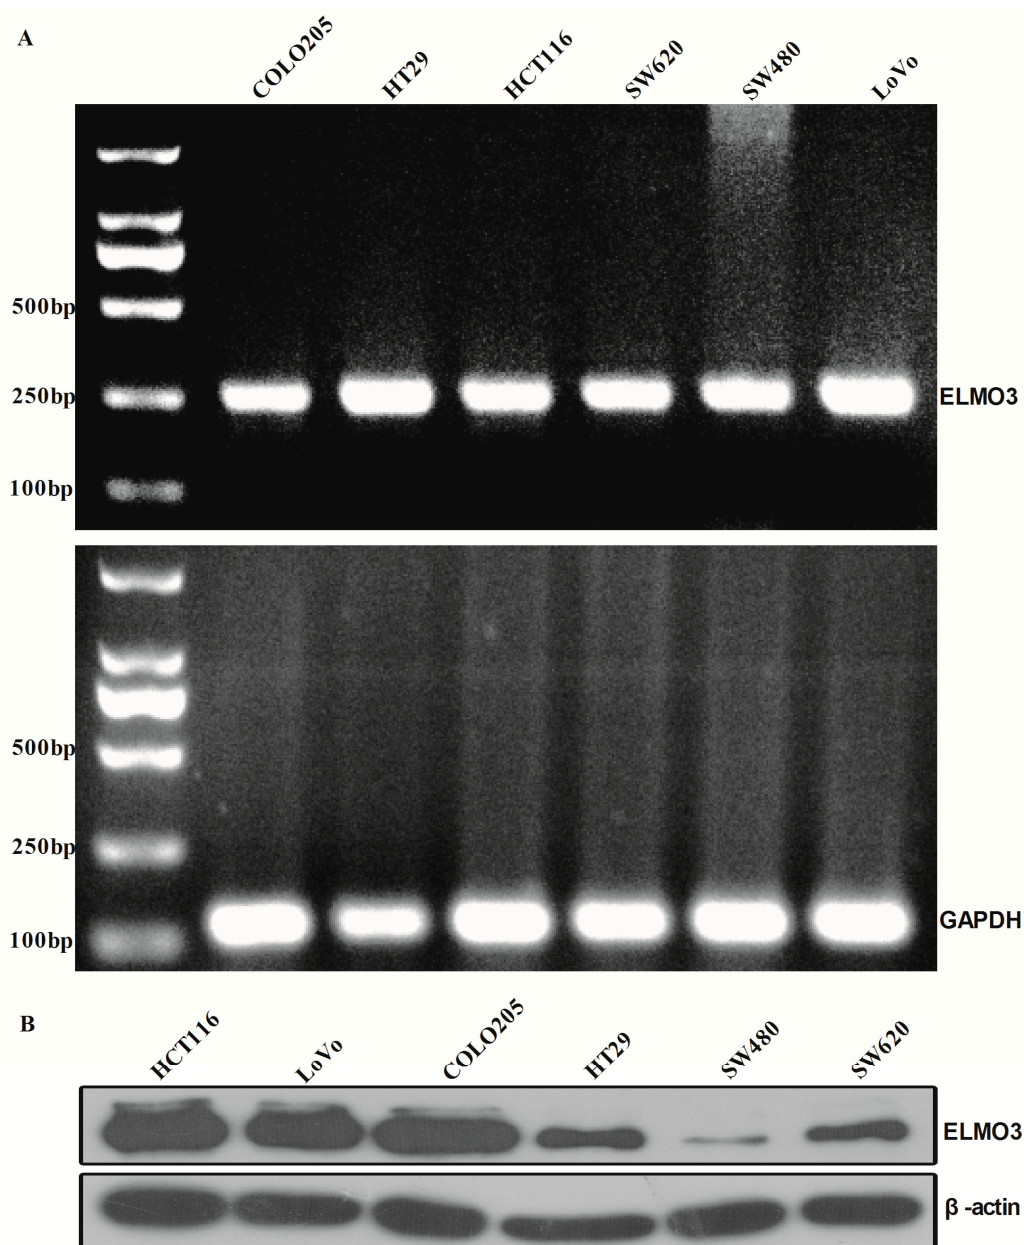

**Figure S1.** The mRNA and protein levels of ELMO3 in CRC cell lines. (A) RT-PCR was used to detect the mRNA level of ELMO3 and (B) Western blot analysis was used to determined protein level of ELMO3.
